# Supplementary material for: The tissue inhibitor of metalloproteinases-1 (TIMP-1) promotes survival and migration of acute myeloid leukemia cells through CD63/PI3K/Akt/p21 signaling
Source: PubMed Central journal article supplement (PMC5356797; doi:10.18632/oncotarget.13664), 2016-11-26
Supplement: oncotarget-08-2261-s001.pdf [file oncotarget-08-2261-s001.pdf]

## The tissue inhibitor of metalloproteinases-1 (TIMP-1) promotes survival and migration of acute myeloid leukemia cells through CD63/PI3K/Akt/p21 signaling

### Supplementary Materials

**Table 1: Patient characteristics**

| # PT | AGE (years) | SEX | CELL SOURCE | SUBCLASS (FAB) | Karyotype       | Molecular genetics                                | WBC (cells/ $\mu$ L) |
|------|-------------|-----|-------------|----------------|-----------------|---------------------------------------------------|----------------------|
| 1    | 66          | M   | PB          | M0/M1          | Normal          | wt                                                | 148,900              |
| 2    | 33          | M   | PB          | NOS            | t(6;9)(p23;q34) | wt                                                | 20,560               |
| 3    | 73          | M   | BM          | M2             | Normal          | wt                                                | 1,580                |
| 4    | 60          | F   | BM          | M4             | t(4)            | NPM1 <sup>+</sup> , FLT3 <sup>+</sup>             | 129,000              |
| 5    | 77          | F   | PB          | M3             | t(15,17)        | PML/RAR $\alpha$                                  | 99,300               |
| 6    | 90          | M   | PB          | NOS            | NA              | wt                                                | 129,000              |
| 7    | 19          | M   | PB          | M0             | t(6;11)         | wt                                                | 100,000              |
| 8    | 57          | F   | PB          | NOS            | Normal          | FLT3-ITD <sup>+</sup> , DNMT3A <sup>+</sup> , WT1 | 78,500               |
| 9    | 70          | M   | PB          | M2             | NA              | FLT3-ITD <sup>+</sup> , NPM1 <sup>+</sup>         | 64,250               |
| 10   | 42          | F   | PB          | M4             | Normal          | FLT3-ITD <sup>+</sup>                             | 20,300               |
| 11   | 67          | M   | BM          | M0-M1          | +(8)            | wt                                                | 1,200                |
| 12   | 69          | M   | PB          | NOS            | Normal          | FLT3-ITD <sup>+</sup>                             | 88,680               |
| 13   | 72          | M   | BM          | NOS            | Normal          | WT1                                               | 260,000              |
| 14   | 66          | F   | BM          | M0/M1          | Normal          | WT1                                               | 141,700              |
| 15   | 47          | F   | BM          | NOS            | Normal          | FLT3-ITD <sup>+</sup>                             | 89,380               |
| 16   | 42          | M   | BM          | M2             | +(8)            | wt                                                | 7,436                |
| 17   | 26          | M   | BM          | M2             | trisomy 22      | DNMT3A                                            | 40,000               |
| 18   | 72          | F   | BM          | NOS            | NA              | WT1                                               | 13,800               |

Abbreviations: FAB, French-American-British classification of acute myeloid leukemia; WBC White blood cells; PB, peripheral blood; BM, bone marrow; NPM, nucleophosmin; FLT3 ITD, fms-like tyrosine kinase 3 internal tandem duplication; DNMT3A DNA-methyltransferase 3A; WT1 Wilms Tumor 1; NOS Not Otherwise Specified; NA Not Available; wt wild type.

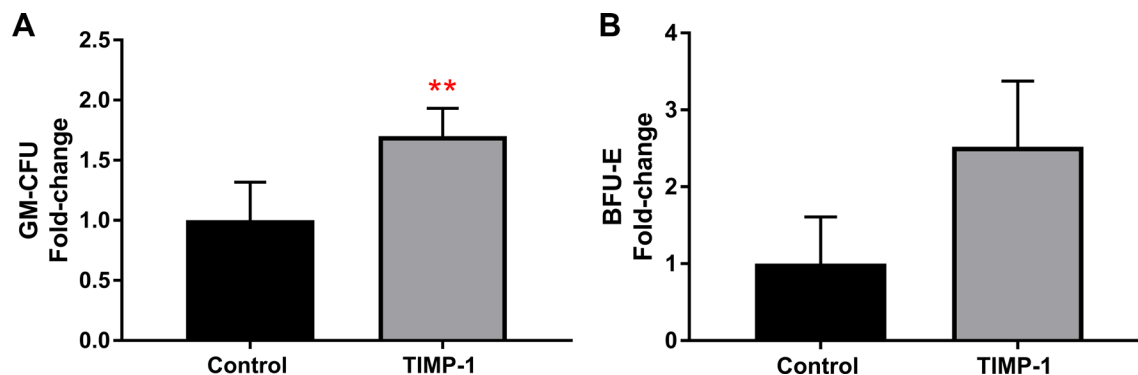

**Supplementary Figure S1: Effects of TIMP-1 on CFU-GM/BFU-E growth from AML-derived cells.** Circulating leukemic blasts were isolated from AML patients and cultured in semisolid medium in the presence of TIMP-1. After 14 days, the total CFU-L output was assessed as above described. **(A)** The CFU-GM growth of the AML-derived leukemic cells was significantly stimulated by TIMP-1 (100 ng/ml,  $**p \leq 0.01$ ) ( $n = 12$ ). The mean number of CFU-GM colonies in untreated (0 ng/ml) and treated (100 ng/ml) AML samples was  $17.5 \pm 5.5$  vs  $28 \pm 9.6$ , respectively. **(B)** The growth of BFU-E showed the same pattern displayed by CFU-GM but not significantly ( $n = 5$ ). The mean number of BFU-E colonies in untreated (0 ng/ml) and treated (100 ng/ml) AML samples was  $7.4 \pm 4.49$  vs  $11 \pm 4.7$ , respectively. The results are expressed as growth fold change versus untreated control samples.

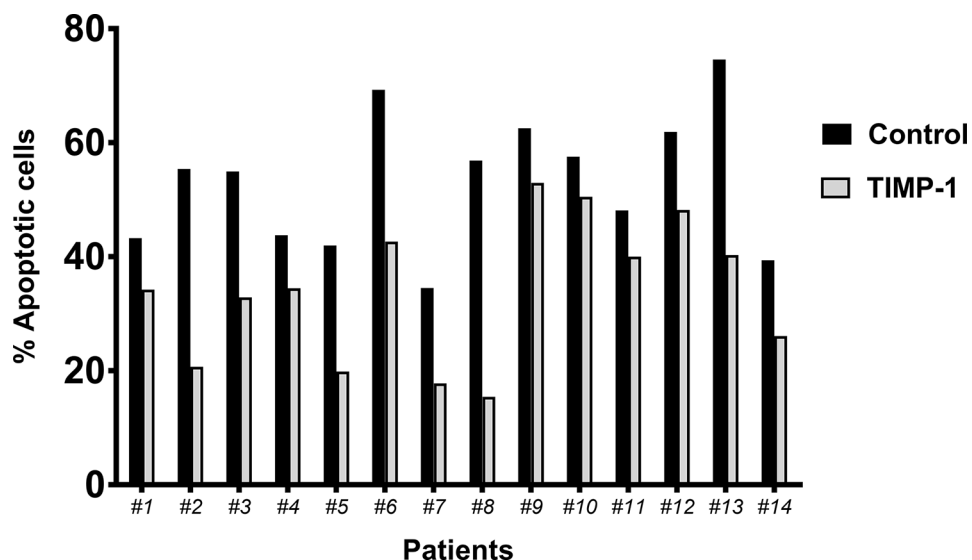

**Supplementary Figure S2: Effects of TIMP-1 on survival in 14 AML patients.** AML cells from 14 patients were in vitro treated for 2 days with TIMP-1 and the percentage of cell viability was assessed after AnnexinV/PI staining, as described in methods. For each patient the percentage of apoptotic cells was reported in the absence (black columns) or in presence of TIMP-1 (grey columns).

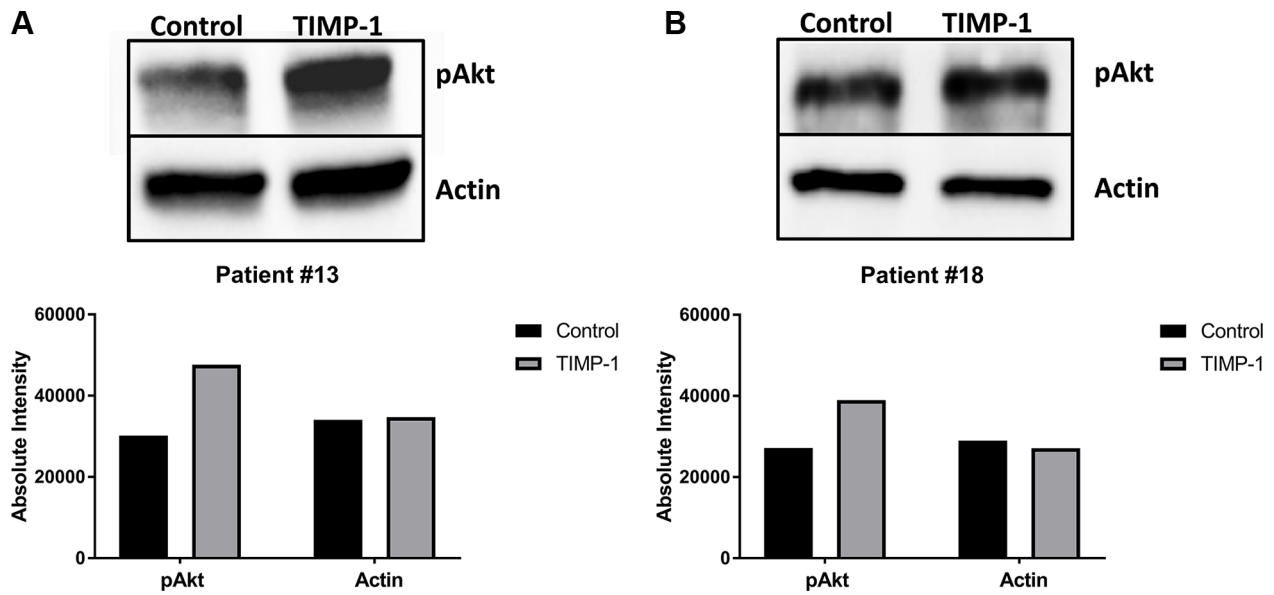

**Supplementary Figure S3: Western blot analysis and absolute quantification of pAkt in AML cells after TIMP-1 treatment.** Representative Western-blot bands of leukemic blasts from two AML patients. Western-blot bands for pAkt (first lane) in AML cells untreated (left band, control) and TIMP-1 treated (right band, TIMP-1) for patient #13 (A) and patient #18 (B). Graphic representation of quantification for pAkt expression and the relative  $\beta$ -actin (data shown below).

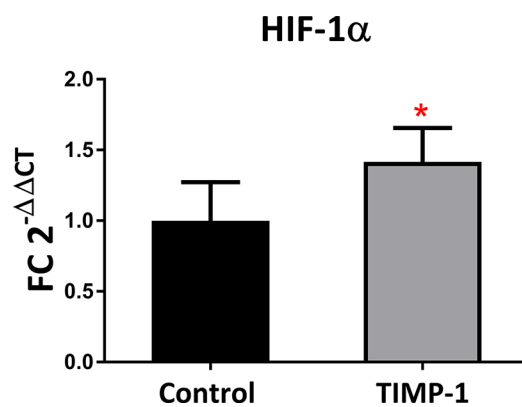

**Supplementary Figure S4: TIMP-1 increased the expression of HIF-1 $\alpha$  at mRNA level.** After 24 hours, total RNA was extracted and the correspondent levels HIF-1 $\alpha$  was assessed by Real-Time PCR. Results was expressed as fold-change taking the value of untreated cells as 1 (\* $p \leq 0.05$ ;  $n = 5$ ).
